# Supplementary material
Source: Springer Nature journal article supplement (https://www.springermedizin.de/resource/supplementary/12936_2008_715_MOESM1_ESM.pdf/9548072)
Supplement: MOESM1 [file 9548072]

Patients 1,7,8,10

**Mutant 268Cys**

gtacctgaatggtactttctaccatttt**tgt**gcaatgttaaaaactggtccaagtaaacca

V P E W Y F L P F **C** A M L K T V P S K P

Patient 4

**Mutant 268Ser**

gtacctgaatggtactttctaccatttt**tct**gcaatgttaaaaactggtccaagtaaacca

V P E W Y F L P F **S** A M L K T V P S K P

Patients 2,3,5,6,9

**Wild-type 268Tyr**

gtacctgaatggtactttctaccatttt**tat**gcaatgttaaaaactggtccaagtaaacca

V P E W Y F L P F **Y** A M L K T V P S K P
